# Supplementary material
Source: PubMed Central journal article supplement (PMC8023852)
Supplement: djaa072_supplementary_data.pdf [file djaa072_supplementary_data.pdf]

**Supplementary Table 1.** Univariate and multivariate Cox models for progression-free survival in patients with MSI metastatic colorectal cancer from sporadic and familial origin

|                              |                | MSI sporadic        |      |           |                       |      |           | MSI familial        |            |      |                       |      |      |           |      |
|------------------------------|----------------|---------------------|------|-----------|-----------------------|------|-----------|---------------------|------------|------|-----------------------|------|------|-----------|------|
|                              |                | Univariate analysis |      |           | Multivariate analysis |      |           | Univariate analysis |            |      | Multivariate analysis |      |      |           |      |
|                              |                | N (events)          | HR   | 95%CI     | P                     | HR   | 95%CI     | P                   | N (events) | HR   | 95%CI                 | P    | HR   | 95%CI     | P    |
| Gender                       | Male           | 19 (15)             | 1    |           |                       |      |           |                     | 41 (34)    | 1    |                       |      | 1    |           |      |
|                              | Female         | 48 (38)             | 1.07 | 0.59-1.96 | 0.82                  |      |           |                     | 20 (11)    | 0.44 | 0.22-0.88             | 0.02 | 0.40 | 0.20-0.82 | 0.01 |
| Age (years) †                | <Median        | 30 (23)             | 1    |           |                       |      |           |                     | 33 (25)    | 1    |                       |      |      |           |      |
|                              | ≥Median        | 37 (30)             | 0.79 | 0.46-1.38 | 0.41                  |      |           |                     | 28 (20)    | 0.67 | 0.36-1.23             | 0.20 |      |           |      |
| ECOG PS                      | 0-1            | 33 (25)             | 1    |           |                       |      |           |                     | 25 (17)    | 1    |                       |      |      |           |      |
|                              | ≥2             | 9 (9)               | 1.9  | 0.87-4.16 | 0.11                  |      |           |                     | 11 (8)     | 1.31 | 0.56-3.07             | 0.54 |      |           |      |
| Primary tumor localization   | Right side     | 58 (46)             | 1    |           |                       |      |           |                     | 33 (22)    | 1    |                       |      |      |           |      |
|                              | Left side      | 8 (6)               | 0.93 | 0.39-2.18 | 0.86                  |      |           |                     | 18 (14)    | 1.1  | 0.55-2.20             | 0.79 |      |           |      |
| Surgery of primary tumor     | No             | 4 (4)               | 1    |           |                       |      |           |                     | 8 (8)      | 1    |                       |      | 1    |           |      |
|                              | Yes            | 63 (49)             | 0.40 | 0.14-1.13 | 0.09 *                |      |           |                     | 53 (37)    | 0.44 | 0.20-0.97             | 0.04 | 0.32 | 0.14-0.74 | 0.01 |
| Synchronicity of metastases  | Synchronous    | 39 (31)             | 1    |           |                       |      |           |                     | 36 (26)    | 1    |                       |      |      |           |      |
|                              | Metachronous   | 28 (22)             | 1.36 | 0.78-2.36 | 0.27                  |      |           |                     | 25 (19)    | 0.59 | 0.30-1.15             | 0.12 |      |           |      |
| Number of metastatic sites   | 1              | 46 (34)             | 1    |           |                       | 1    |           |                     | 36 (22)    | 1    |                       |      |      |           |      |
|                              | ≥2             | 21 (19)             | 1.70 | 0.96-3.01 | 0.07                  | 1.65 | 0.92-2.94 | 0.09                | 25 (23)    | 1.43 | 0.79-2.58             | 0.24 |      |           |      |
| Liver metastases             | No             | 49 (42)             | 1    |           |                       |      |           |                     | 30 (21)    | 1    |                       |      |      |           |      |
|                              | Yes            | 18 (11)             | 0.72 | 0.37-1.41 | 0.34                  |      |           |                     | 31 (24)    | 1.21 | 0.66-2.21             | 0.54 |      |           |      |
| Lung metastases              | No             | 56 (44)             | 1    |           |                       |      |           |                     | 55 (41)    | 1    |                       |      |      |           |      |
|                              | Yes            | 11 (9)              | 0.68 | 0.33-1.40 | 0.29                  |      |           |                     | 6 (4)      | 0.98 | 0.35-2.77             | 0.97 |      |           |      |
| Peritoneal metastases        | No             | 38 (26)             | 1    |           |                       | 1    |           |                     | 32 (23)    | 1    |                       |      |      |           |      |
|                              | Yes            | 29 (27)             | 1.63 | 0.94-2.83 | 0.08                  | 1.54 | 0.88-2.67 | 0.13                | 29 (22)    | 1.21 | 0.65-2.22             | 0.55 |      |           |      |
| Lymph nodes metastases       | No             | 41 (31)             | 1    |           |                       |      |           |                     | 43 (30)    | 1    |                       |      |      |           |      |
|                              | Yes            | 26 (22)             | 1.13 | 0.66-1.96 | 0.65                  |      |           |                     | 18 (15)    | 0.8  | 0.42-1.52             | 0.50 |      |           |      |
| Tumor differentiation        | Well /moderate | 30 (23)             | 1    |           |                       |      |           |                     | 34 (26)    | 1    |                       |      |      |           |      |
|                              | Poor           | 27 (25)             | 1.34 | 0.76-2.36 | 0.32                  |      |           |                     | 20 (13)    | 0.76 | 0.39-1.48             | 0.42 |      |           |      |
| BRAF status                  | Wild-type      | 17 (13)             | 1    |           |                       |      |           |                     | 53 (40)    | 1    |                       |      |      |           |      |
|                              | Mutated        | 50 (40)             | 0.88 | 0.47-1.65 | 0.69                  |      |           |                     | 4 (2)      | 0.73 | 0.17-3.06             | 0.67 |      |           |      |
| KRAS exon 2 status           | Wild-type      | 62 (49)             | 1    |           |                       |      |           |                     | 36 (26)    | 1    |                       |      |      |           |      |
|                              | Mutated        | 5 (4)               | 2.88 | 0.99-8.41 | 0.05 *                |      |           |                     | 19 (14)    | 1.04 | 0.54-2.02             | 0.91 |      |           |      |
| Chemotherapy regimen         | Folfox-based   | 38 (29)             | 1    |           |                       |      |           |                     | 32 (24)    | 1    |                       |      |      |           |      |
|                              | Folfiri-based  | 14 (11)             | 0.73 | 0.35-1.55 | 0.41                  |      |           |                     | 19 (14)    | 0.75 | 0.38-1.48             | 0.41 |      |           |      |
| Anti-EGFR-based chemotherapy | No             | 52 (43)             | 1    |           |                       | 1    |           |                     | 44 (33)    | 1    |                       |      | 1    |           |      |
|                              | Yes            | 15 (10)             | 0.80 | 0.39-1.60 | 0.52                  | 0.75 | 0.37-1.51 | 0.42                | 17 (12)    | 0.47 | 0.23-0.94             | 0.03 | 0.49 | 0.24-0.98 | 0.04 |

Anti-EGFR-based chemotherapy and variables with P value <0.10 in univariate analysis were included in multivariate model (except variables including less than 5 patients in one of their categories, i.e. surgery of primary tumor and KRAS exon 2 status in MSI sporadic \*)

† The cut-off for age was based on the median age in sporadic (70 years) and familial (50 years) MSI cases

Abbreviations: MSI, microsatellite instability; EGFR, epidermal growth factor receptor; ECOG PS, Eastern Cooperative Oncology Group performance status; HR, Hazard Ratio; 95%CI, confidence interval

**Supplementary Table 2.** Efficacy in progression-free survival of adding anti-EGFR to first-line chemotherapy based on propensity score with logistic regression in patients with MSI metastatic colorectal cancer from sporadic and familial origin

|                            |                | MSI sporadic          |      |            |       |                         |      |            |      | MSI familial          |      |            |       |                         |      |            |      |
|----------------------------|----------------|-----------------------|------|------------|-------|-------------------------|------|------------|------|-----------------------|------|------------|-------|-------------------------|------|------------|------|
|                            |                | Univariate analysis † |      |            |       | Multivariate analysis † |      |            |      | Univariate analysis † |      |            |       | Multivariate analysis † |      |            |      |
|                            |                | N (anti-EGFR therapy) | OR   | 95%CI      | P     | N (anti-EGFR therapy)   | OR   | 95%CI      | P    | N (anti-EGFR therapy) | OR   | 95%CI      | P     | N (anti-EGFR therapy)   | OR   | 95%CI      | P    |
| Gender                     | Male           | 19 (6)                | 1    |            |       |                         |      |            |      | 41 (11)               | 1    |            |       |                         |      |            |      |
|                            | Female         | 48 (9)                | 0.50 | 0.15-1.68  | 0.26  |                         |      |            |      | 20 (6)                | 1.17 | 0.36-3.80  | 0.80  |                         |      |            |      |
| Age (years)                | Continuous     | 67 (15)               | 0.98 | 0.93-1.03  | 0.40  |                         |      |            |      | 61 (17)               | 1.04 | 0.99-1.09  | 0.12  |                         |      |            |      |
|                            | 0-1            | 33 (6)                | 1    |            |       |                         |      |            |      | 25 (8)                | 1    |            |       |                         |      |            |      |
| ECOG PS                    | ≥2             | 9 (2)                 | 1.29 | 0.21-7.80  | 0.79  |                         |      |            |      | 11 (3)                | 0.80 | 0.17-3.83  | 0.78  |                         |      |            |      |
|                            | Right side     | 58 (14)               | 1    |            |       |                         |      |            |      | 33 (12)               | 1    |            |       |                         |      |            |      |
| Primary tumor localization | Left side      | 8 (1)                 | 0.45 | 0.05-3.97  | 0.47  |                         |      |            |      | 18 (4)                | 0.50 | 0.13-1.87  | 0.30  |                         |      |            |      |
|                            | No             | 4 (3)                 | 1    |            |       |                         |      |            |      | 8 (2)                 | 1    |            |       |                         |      |            |      |
| Surgery of primary tumor   | Yes            | 63 (12)               | 0.08 | 0.01-0.82  | 0.03* |                         |      |            |      | 53 (15)               | 1.18 | 0.22-6.54  | 0.85  |                         |      |            |      |
|                            | Synchronous    | 39 (8)                | 1    |            |       |                         |      |            |      | 36 (5)                | 1    |            |       | 26 (4)                  | 1    |            |      |
| Synchronicity of met.      | Metachronous   | 28 (7)                | 1.29 | 0.41-4.10  | 0.66  |                         |      |            |      | 25 (12)               | 5.72 | 1.68-19.54 | 0.01  | 25 (12)                 | 2.35 | 0.50-11.15 | 0.28 |
|                            | 1              | 46 (10)               | 1    |            |       |                         |      |            |      | 36 (11)               | 1    |            |       |                         |      |            |      |
| Number of met. sites       | ≥2             | 21 (5)                | 1.13 | 0.33-3.83  | 0.85  |                         |      |            |      | 25 (6)                | 0.72 | 0.23-2.29  | 0.57  |                         |      |            |      |
|                            | No             | 49 (11)               | 1    |            |       |                         |      |            |      | 30 (11)               | 1    |            |       |                         |      |            |      |
| Liver met.                 | Yes            | 18 (4)                | 0.99 | 0.27-3.62  | 0.98  |                         |      |            |      | 31 (6)                | 0.42 | 0.13-1.32  | 0.14  |                         |      |            |      |
|                            | No             | 56 (13)               | 1    |            |       |                         |      |            |      | 55 (15)               | 1    |            |       |                         |      |            |      |
| Lung met.                  | Yes            | 11 (2)                | 0.74 | 0.14-3.84  | 0.71  |                         |      |            |      | 6 (2)                 | 1.33 | 0.22-8.05  | 0.75  |                         |      |            |      |
|                            | No             | 38 (9)                | 1    |            |       |                         |      |            |      | 32 (9)                | 1    |            |       |                         |      |            |      |
| Peritoneal met.            | Yes            | 29 (6)                | 0.84 | 0.26-2.71  | 0.77  |                         |      |            |      | 29 (8)                | 0.97 | 0.32-2.98  | 0.96  |                         |      |            |      |
|                            | No             | 41 (8)                | 1    |            |       |                         |      |            |      | 43 (9)                | 1    |            |       | 36 (9)                  | 1    |            |      |
| Lymph nodes met.           | Yes            | 26 (7)                | 1.52 | 0.48-4.85  | 0.48  |                         |      |            |      | 18 (8)                | 3.02 | 0.92-9.88  | 0.07  | 15 (7)                  | 1.94 | 0.4-8.06   | 0.38 |
|                            | Well /moderate | 30 (3)                | 1    |            |       | 23 (3)                  | 1    |            |      | 34 (7)                | 1    |            |       |                         |      |            |      |
| Tumor differentiation      | Poor           | 27 (8)                | 3.79 | 0.89-16.17 | 0.07  | 22 (8)                  | 4.27 | 0.82-22.19 | 0.08 | 20 (8)                | 2.57 | 0.76-8.72  | 0.13  |                         |      |            |      |
|                            | Wild-type      | 17 (4)                | 1    |            |       |                         |      |            |      | 53 (15)               | 1    |            |       |                         |      |            |      |
| BRAF status                | Mutated        | 50 (11)               | 0.92 | 0.25-3.38  | 0.90  |                         |      |            |      | 4 (2)                 | 2.53 | 0.33-19.66 | 0.37  |                         |      |            |      |
|                            | Folfox-based   | 38 (31)               | 1    |            |       | 34 (5)                  | 1    |            |      | 32 (4)                | 1    |            |       | 36 (9)                  | 1    |            |      |
| Chemotherapy               | Folfiri-based  | 14 (6)                | 5.91 | 1.54-22.53 | 0.01  | 11 (6)                  | 7.64 | 1.50-39.03 | 0.01 | 19 (12)               | 12   | 2.95-48.76 | <.001 | 15 (7)                  | 1.94 | 0.4-8.06   | 0.38 |

  

|                        |     | IPTW Cox analysis †† |      |           |      | IPTW Cox analysis †† |      |           |      |
|------------------------|-----|----------------------|------|-----------|------|----------------------|------|-----------|------|
|                        |     | N (events)           | HR   | 95%CI     | P    | N (events)           | HR   | 95%CI     | P    |
| Anti-EGFR-based chemo. | No  | 34 (28)              | 1    |           |      | 35 (26)              | 1    |           |      |
|                        | Yes | 11 (9)               | 0.80 | 0.50-1.26 | 0.34 | 16 (12)              | 0.63 | 0.41-0.97 | 0.04 |

In order to limit potential bias due to confounding parameters unbalanced between treatment arms in sporadic and familial MSI groups, the inverse probability of treatment weighting method (IPTW) was applied in the Cox regression model using the propensity score.

† The probability to receive anti-EGFR therapy was estimated using logistic regression analysis for each clinical and pathological characteristics and odds ratio (OR) with 95% confidence interval (CI) were provided. Except variables with less than 5 patients in one of their category (i.e. surgery of primary tumor for MSI sporadic\*), those with P value <0.10 in univariate analysis were included in the multivariate logistic regression model (i.e. tumor differentiation and chemotherapy regimen for MSI sporadic; i.e. synchronicity of metastases, lymph nodes metastases and chemotherapy regimen for MSI familial). †† The propensity score, derived from the multivariate logistic model, was used in the inverse probability of treatment weighting methodology (IPTW) applied in the univariate cox regression to evaluate the efficacy of adding anti-EGFR agents in terms of progression-free survival.

Abbreviations: MSI, microsatellite instability; Met, Metastases; Chemo, Chemotherapy; EGFR, epidermal growth factor receptor; ECOG PS, Eastern Cooperative Oncology Group performance status; HR, Hazard Ratio; OR, Odds Ratio; 95%CI, confidence interval
